# Supplementary material for: The chick pallium displays divergent expression patterns of chick orthologues of mammalian neocortical deep layer-specific genes
Source: PubMed Central journal article supplement (PMC6938507; doi:10.1038/s41598-019-56960-4), 2019-12-31
Supplement: 41598_2019_56960_MOESM1_ESM.pdf [file 41598_2019_56960_MOESM1_ESM.pdf]

Supplementary information to

**The chick pallium displays divergent expression patterns of chick orthologues of mammalian neocortical deep layer-specific genes**

Toshiyuki Fujita<sup>1</sup>, Naoya Aoki<sup>1</sup>, Eiko Fujita<sup>1</sup>, Toshiya Matsushima<sup>2</sup>, Koichi J. Homma<sup>1</sup>, and Shinji Yamaguchi<sup>1\*</sup>

<sup>1</sup> Faculty of Pharmaceutical Sciences, Department of Life and Health Sciences, Teikyo University, 2-11-1 Kaga, Itabashi-ku, Tokyo, 173-8605, Japan

<sup>2</sup> Department of Biology, Faculty of Science, Hokkaido University, Hokkaido 060-0810, Japan

\*Corresponding author:

Shinji Yamaguchi, Ph.D.

E-mail: shinji-y@pharm.teikyo-u.ac.jp

Tel: +81-3-3964-8136

Fax: +81-3-3964-8415

**Supplementary Table S1**

## Supplemental Table S1. Pallial expression of the cortical deep layer-selective genes in mice

| Gene name    | Cortical deep layers (L5 and/or L6) | Clastrum | Endopiriform nuclei | Piriform cortex | Pallial amygdala | Hippocampal formation | Olfactory bulb | References <sup>1)</sup>                            |
|--------------|-------------------------------------|----------|---------------------|-----------------|------------------|-----------------------|----------------|-----------------------------------------------------|
| <i>Nr4a2</i> | +                                   | +        | +                   | -               | -                | +                     | +              | Wang, et al., 2011, Allen Brain Atlas <sup>2)</sup> |
| <i>Ctgf</i>  | +                                   | -        | +                   | -               | -                | -                     | +              | Wang, et al., 2011, Allen Brain Atlas <sup>3)</sup> |
| <i>Nefh</i>  | +                                   | -        | -                   | +               | -                | +                     | +              | Allen Brain Atlas <sup>4)</sup>                     |
| <i>Tox</i>   | +                                   | +        | -                   | -               | -                | +                     | -              | Allen Brain Atlas <sup>5)</sup>                     |
| <i>Ctip2</i> | +                                   | -        | -                   | +               | +                | +                     | +              | Allen Brain Atlas <sup>6)</sup>                     |
| <i>Foxp2</i> | +                                   | -        | -                   | +               | -                | -                     | +              | Allen Brain Atlas <sup>7)</sup>                     |

- 1) Allen Mouse Brain Atlas's reference plate #12 for cortical deep layers, claustrum, endopiriform nuclei, piriform cortex, hippocampal formation and olfactory bulb, and #3 for pallial amygdala in Allen Brain Atlas
- 2) Experiment #733 in Allen Brain Atlas
- 3) Experiment #1184 in Allen Brain Atlas
- 4) Experiment #71920442 in Allen Brain Atlas
- 5) Experiment #69817025 in Allen Brain Atlas
- 6) Experiment #74990505 in Allen Brain Atlas
- 7) Experiment #68918282 in Allen Brain Atlas
